# Supplementary material
Source: PubMed Central journal article supplement (PMC6926442)
Supplement: supp_RA119.011002_155734_1_supp_424503_q0bgb0.pdf [file supp_RA119.011002_155734_1_supp_424503_q0bgb0.pdf]

# Supporting Information for

## **The molecular architecture of photoreceptor phosphodiesterase 6 (PDE6) with activated G protein elucidates the mechanism of visual excitation**

Michael J. Irwin, Richa Gupta, Xiong-Zhuo Gao, Karyn B. Cahill, Feixia Chu, Rick H. Cote

### **This PDF file includes:**

- Table S1. PDE6 holoenzyme crosslinked peptides and identification scores.
- Table S2.  $G_{t\alpha}$ -GDP- $AlF_4^-$  and  $P\gamma$  crosslinked peptides and identification scores.
- Table S3.  $G_{t\alpha}$ -GDP- $AlF_4^-$  and PDE6 holoenzyme activation complex crosslinked peptides and identification scores.
- Fig. S1. Structural alignment of rod PDE6 catalytic subunits.
- Fig. S2. New and refined structural elements of the catalytic and inhibitory subunits of PDE6 resolved by chemical crosslinking and integrative structural modeling.
- Fig. S3. RMSD plots of differences between the cryo-EM structure 6MZB and the crosslinked-refined solution structure of the PDE6 catalytic dimer.
- Fig. S4. RMSD plot comparing the catalytic domains of activated and nonactivated PDE6.
- Fig. S5. Preparation of DOTAP/DOPC-coated silica beads (“lipobeads”) for studying transducin activation of PDE6 attached to liposomes.
- References

**Table S1.** PDE6 holoenzyme crosslinked peptides and identification scores.

| pep1 | aa1 | pep2  | aa2     | score | fragment 1                         | fragment 2                                       |
|------|-----|-------|---------|-------|------------------------------------|--------------------------------------------------|
| Pβ   | 471 | Pβ    | 475     | 31.1  | E(+EDC)R                           | LGK(+EDC)EPADC(Carbamidomethyl)EEDELGK           |
| Pβ   | 675 | Pβ    | 813     | 10.6  | K(+EDC)R                           | ALADE(+EDC)YEAQ                                  |
| Pβ   | 675 | Pβ    | 815     | 20.0  | K(+EDC)R                           | ALADEYE(+EDC)AK                                  |
| Pβ   | 823 | Pβ    | 832     | 18.4  | ALEE(+EDC)DQK                      | KETTAK(+EDC)K                                    |
| Pβ   | 824 | Pβ    | 832     | 11.2  | ALEED(+EDC)QK                      | KETTAK(+EDC)K                                    |
| Pβ   | 825 | Pβ    | 827     | 24.1  | ALEEDQ(+User Defined Link)K        | K(+User Defined Link)ETTAK                       |
| Pβ   | 826 | Pβ    | 828     | 22.2  | ALEEDQK(+User Defined Link)K       | E(+User Defined Link)                            |
| Pβ   | 826 | Pβ    | 829     | 23.4  | ALEEDQK(+User Defined Link)K       | ET(+User Defined Link)TAK                        |
| Pβ   | 826 | Pβ    | 831     | 22.8  | ALLEQJ(+User Defined Link)K        | ETTA(+User Defined Link)K                        |
| Pβ   | 826 | Pa/Pβ | 445/444 | 23.7  | ALEEDQK(+User Defined Link)K       | LENR(+User Defined Link)K                        |
| Pβ   | 826 | Pa/Pβ | 442/441 | 20.1  | ALEEDQK(+User Defined Link)K       | L(+User Defined Link)ENRK                        |
| Pβ   | 826 | Pβ    | 828     | 30.4  | ALEEDQK(+EDC)K                     | E(+EDC)TTAKK                                     |
| Pβ   | 826 | Pa/Pβ | 444/443 | 17.7  | ALEEDQK(+User Defined Link)K       | LENR(+User Defined Link)K                        |
| Pβ   | 826 | Pβ    | 832     | 14.5  | ALEEDQK(+User Defined Link)K       | ETTAK(+User Defined Link)K                       |
| Pγ   | 1   | Pβ    | 78      | 23.9  | (+DSS)-MNLEPPKAEIR                 | VVFK(+DSS)ILR                                    |
| Pγ   | C2  | Pβ    | 84      | 15.4  | VMC(+User Defined Link)GPVTPRKGPPK | C(+User Defined Link)SLFMYR                      |
| Pγ   | 4   | Pβ    | 146     | 19.8  | MNLE(+EDC)PPK                      | DIGVVGHVAQTK(+EDC)                               |
| Pγ   | 7   | Pβ    | 184     | 19.8  | MNLE(+EDC)PPK                      | DIGVVGHVAQTK(+EDC)                               |
| Pγ   | C18 | Pa    | 383     | 7.5   | VMC(+User Defined Link)GPVTPRKGPPK | ELDESGWMFK(+User Defined Link)                   |
| Pγ   | C18 | Pβ    | 92      | 9.9   | VMC(+User Defined Link)GPVTPRKGPPK | C(+User Defined Link)SLFMYR                      |
| Pγ   | C18 | Pa    | 233     | 7.6   | VMC(+User Defined Link)GPVTPRKGPPK | VFHLSYLHNC(+User Defined Link)ETRR               |
| Pγ   | 31  | Pβ    | 200     | 8.3   | KFK(+User Defined Link)QR          | KLDPC(+User Defined Link)FTSEDEDVFLK             |
| Pγ   | 41  | Pa    | 469     | 17.8  | QFKSK(+User Defined Link)PPK       | C(Carbamidomethyl)DNEEIQTIL(+User Defined Link)K |
| Pγ   | 44  | Pa/Pβ | 613/611 | 15.8  | GTNNLYQMK(+DSS)SQNPLAK             | QFK(Xlink:DSS1)SKPPK(+DSS)K                      |
| Pγ   | 44  | Pβ    | 475     | 24.5  | QFKSK(+User Defined Link)PPK       | C(Carbamidomethyl)DNEEIQTIL(+User Defined Link)K |
| Pγ   | 52  | Pa/Pβ | 328/326 | 16.4  | QFK(Xlink:DSS1)SKPPK(+DSS)K        | GTNNLYQMK(+DSS)SQNPLAK                           |
| Pγ   | K62 | Pβ    | 450     | 20.6  | QFKSKPPK(+DSS)K                    | ERLGK(+DSS)EPADC(Carbamidomethyl)EEDELGK         |
| Pγ   | K62 | Pβ    | 446     | 18.7  | GVQGFQD(+EDC)                      | DYILHGKEDIK(+EDC)                                |
| Pγ   | K62 | Pa/Pβ | 394     | 32.4  | DDIPGMEGLGK(+EDC)                  | DIAQD(+EDC)MMLYHVRC(Carbamidomethyl)             |
| Pγ   | K62 | Pa/Pβ | 393     | 33.4  | DDIPGMEGLGK(+EDC)                  | D(+EDC)IAQDMMLYHVRC(Carbamidomethyl)             |
| Pγ   | K65 | Pa    | 767     | 18.0  | DDIPGMKGLGK(+EDC)                  | KEE(+EDC)IVGVATFYNR                              |
| Pγ   | C68 | Pβ    | 839     | 22.8  | DDIPGMKGLGK(+EDC)                  | KE(+EDC)EIVGVATFYNR                              |

Refer to Table 1 for precursor charge and m/z for each cross-linked peptide.

**Table S2.** Gt $\alpha$ -GDP-AIF $_4^-$  and P $\gamma$  crosslinked peptides and identification scores

| pep1        | aa1 | pep2        | aa2 | score | frag 1                            | frag 2                  |
|-------------|-----|-------------|-----|-------|-----------------------------------|-------------------------|
| Gt $\alpha$ | 16  | Gt $\alpha$ | 20  | 24.8  | ELE(+EDC)KK                       | LK(+EDC)EDA EK DAR      |
| Gt $\alpha$ | 16  | Gt $\alpha$ | 25  | 22.3  | ELE(+EDC)KK                       | LKEDA EK(+EDC)DAR       |
| Gt $\alpha$ | 17  | Gt $\alpha$ | 20  | 25.8  | ELEK(+DSS)K                       | LK(+DSS)EDA EK          |
| Gt $\alpha$ | 17  | Gt $\alpha$ | 21  | 21.1  | ELEK(+EDC)KLK                     | E(+EDC)DA EK            |
| Gt $\alpha$ | 17  | Gt $\alpha$ | 22  | 21.1  | ELEK(+EDC)KLK                     | ED(+EDC)A EK            |
| Gt $\alpha$ | 17  | Gt $\alpha$ | 31  | 38.0  | ELEK(+DSS)K                       | TVK(+DSS)LLLLGAGESGK    |
| Gt $\alpha$ | 18  | Gt $\alpha$ | 26  | 22.1  | K(+EDC)LKEDA EK                   | D(+EDC)AR               |
| Gt $\alpha$ | 18  | Gt $\alpha$ | 31  | 39.2  | K(+DSS)JK                         | TVK(+DSS)LLLLGAGESGK    |
| Gt $\alpha$ | 18  | Gt $\alpha$ | 267 | 26.1  | K(+DSS)JK                         | K(+DSS)DVFSEK           |
| Gt $\alpha$ | 20  | Gt $\alpha$ | 31  | 40.4  | LK(+DSS)EDA EK DAR                | LK(+DSS)LLLLGAGESGK     |
| Gt $\alpha$ | 20  | Gt $\alpha$ | 205 | 18.7  | LK(+DSS)EDA EK                    | K(+DSS)K                |
| Gt $\alpha$ | 21  | Gt $\alpha$ | 275 | 20.5  | E(+User Defined Link)DA EK DAR    | IK(+User Defined Link)K |
| Gt $\alpha$ | 24  | Gt $\alpha$ | 31  | 39.2  | LKEDA EK(+EDC)K                   | TVK(+EDC)LLLLGAGESGK    |
| Gt $\alpha$ | 25  | Gt $\alpha$ | 31  | 42.8  | LKEDA EK(+DSS)DAR                 | TVK(+DSS)LLLLGAGESGK    |
| Gt $\alpha$ | 25  | Gt $\alpha$ | 189 | 15.2  | LKEDA EK(+EDC)DAR                 | D(+EDC)LNFR             |
| Gt $\alpha$ | 26  | Gt $\alpha$ | 31  | 38.8  | D(+EDC)AR                         | TVK(+EDC)LLLLGAGESGK    |
| Gt $\alpha$ | 26  | Gt $\alpha$ | 205 | 17.6  | D(+EDC)AR                         | SERK(+EDC)K             |
| Gt $\alpha$ | 39  | Gt $\alpha$ | 47  | 35.1  | LLLLGAGE(+EDC)SGK                 | STIVK(+EDC)QMK          |
| Gt $\alpha$ | 169 | Gt $\alpha$ | 176 | 44.2  | VK(+EDC)TTGIETQFSFK               | LVTPGYVPTEQD(+EDC)VLR   |
| Gt $\alpha$ | 267 | Gt $\alpha$ | 275 | 25.1  | K(+DSS)DVFSEK                     | IK(+DSS)K               |
| Gt $\alpha$ | 267 | Gt $\alpha$ | 342 | 9.2   | K(+EDC)DVFSEK                     | E(+EDC)NLK              |
| Gt $\alpha$ | 98  | P $\gamma$  | 39  | 10.4  | D(+EDC)DARK                       | EFK(+EDC)               |
| Gt $\alpha$ | 129 | P $\gamma$  | 25  | 13.3  | D(+EDC)SGIQAC(Carbamidomethyl)FDR | K(+EDC)GPPKFK           |
| Gt $\alpha$ | 203 | P $\gamma$  | 39  | 15.2  | DVGGQRSE(+EDC)R                   | QFK(+EDC)               |
| Gt $\alpha$ | 203 | P $\gamma$  | 45  | 16.3  | K(+EDC)GVQGFG                     | SE(+EDC)RKK             |

Refer to Table 2 for precursor charge and m/z for each cross-linked peptide.

**Table S3.** Gt<sub>α</sub>-GDP-AIF<sub>4</sub><sup>-</sup> and PDE6 holoenzyme activation complex crosslinked peptides and identification scores.

| pep1            | aa1     | pep2  | aa2     | score | frag 1                                      | frag 2                                                 |
|-----------------|---------|-------|---------|-------|---------------------------------------------|--------------------------------------------------------|
| Gt <sub>α</sub> | 9       | Pa/Pβ | 442/440 | 10.0  | Acetyl-MGAGASAE(+EDC)K                      | M(Oxidation)NK(+EDC)LENR                               |
| Gt <sub>α</sub> | 10      | Pβ    | 826     | 16.7  | Xlink:DSS2-MGAGASAEK(+User Defined Link)HSR | ALEEDQK(+User Defined Link)K                           |
| Gt <sub>α</sub> | 10      | Pα    | 854     | 7.2   | Acetyl-MGAGASAEK(+DSS)HSRELEK               | QPGGGPASK(+DSS)SC(Carbamidomethyl)C(Carbamidomethyl)VQ |
| Gt <sub>α</sub> | 17      | Pα    | 551     | 11.7  | ELEK(BS3)K                                  | FM(oxidation)YLSK(BS3)GYR                              |
| Gt <sub>α</sub> | 17      | Pβ    | 817     | 23.3  | ELEK(+User Defined Link)                    | ALADEYEAK(+User Defined Link)                          |
| Gt <sub>α</sub> | 17      | Pa/Pβ | 808/806 | 5.7   | ELEK(+EDC)K                                 | E(+EDC)WK                                              |
| Gt <sub>α</sub> | 20      | Pa/Pβ | 807/805 | 12.7  | LK(+DSS)EDAEDARTVK                          | K(+DSS)EWK                                             |
| Gt <sub>α</sub> | 20      | Pa/Pβ | 620/618 | 10.1  | LK(+DSS)EDAEDK                              | SQNPLAK(+DSS)LHGSSILER                                 |
| Gt <sub>α</sub> | 24      | Pa/Pβ | 330/328 | 17.1  | DYILHGKEDIK(+User Defined Link)VIPSPPA      | DAE(+User Defined Link)K                               |
| Gt <sub>α</sub> | 25      | Pα    | 309     | 12.7  | EDAEDK(+EDC)DAR                             | TPD(+EDC)GREINFYK                                      |
| Gt <sub>α</sub> | 128     | Pa/Pβ | 807/805 | 15.6  | LWK(+DSS)DSGIQAC(Carbamidomethyl)FDR        | K(+DSS)EWEK                                            |
| Gt <sub>α</sub> | 275     | Pβ    | 307     | 9.5   | IK(EDC)K                                    | TPD(EDC)GREILFYK                                       |
| Gt <sub>α</sub> | 98      | Pγ    | 41      | 6.1   | QD(+EDC)DAR                                 | SK(+EDC)PPK                                            |
| Gt <sub>α</sub> | 275     | Pγ    | 29      | 27.2  | IK(+DSS)K                                   | KGPPK(+DSS)FK                                          |
| Pa/Pβ           | 328/326 | Pγ    | 25      | 9.8   | ED(EDC)IK                                   | K(EDC)GPPK                                             |
| Pα              | 551     | Pγ    | 29      | 10.7  | FM(oxidation)YLSK(BS3)GYR                   | ELEK(BS3)K                                             |

Refer to Table 3 for precursor charge and m/z for each cross-linked peptide.



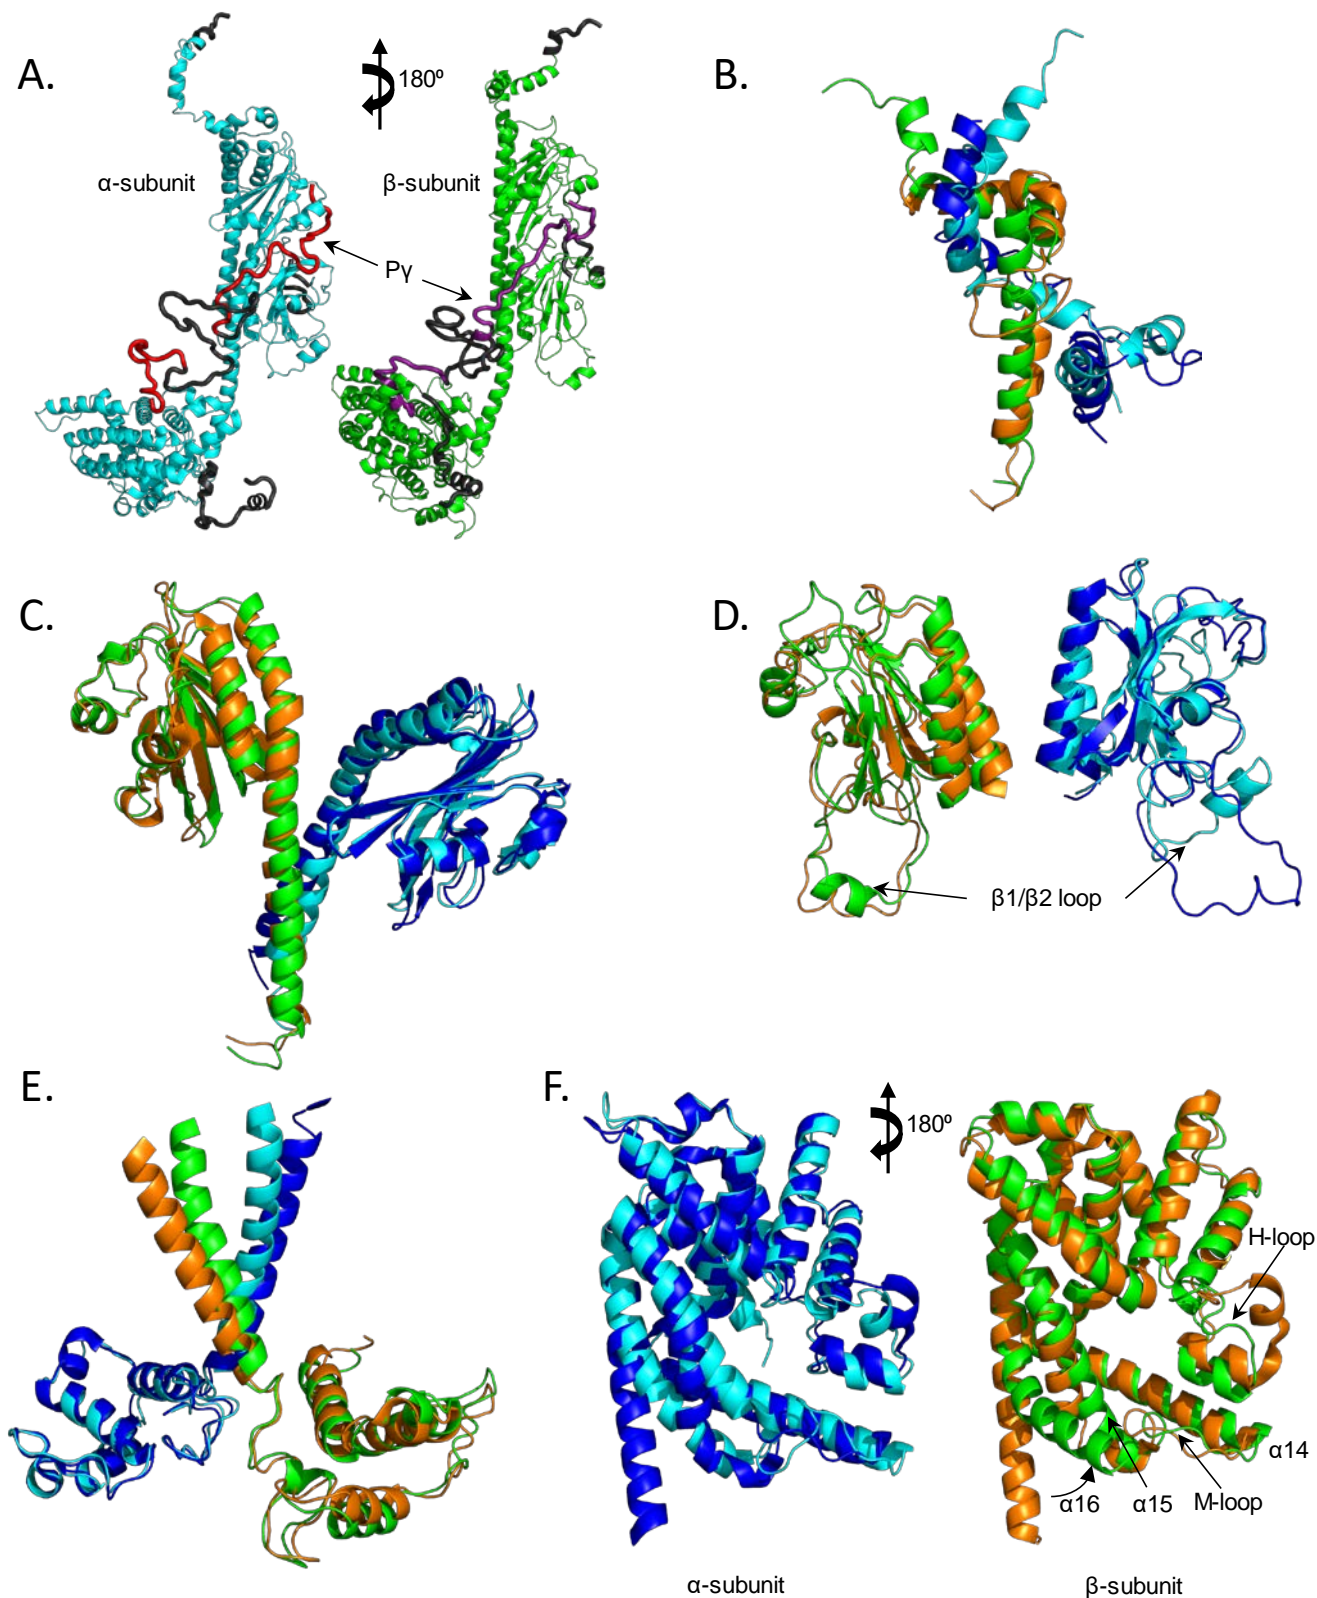

**Fig. S2. New and refined structural elements of the catalytic and inhibitory subunits of PDE6 resolved by chemical crosslinking and integrative structural modeling.** A. The  $\alpha$ - (cyan) and  $\beta$ -subunit (green) with their associated  $P\gamma$  subunit are shown highlighting in black the portions of each subunit that were not previously resolved in the 6MZB cryo-EM structure (3). B.-F. Differences between our structural model (cyan and green) and 6MZB (blue and orange) for the N-terminal region (B), GAFa domain (C), GAFb domain (D), the "linker" region connecting GAFb with the core catalytic domain (E) and the catalytic domain (shown as separate monomeric units for clarity, F).

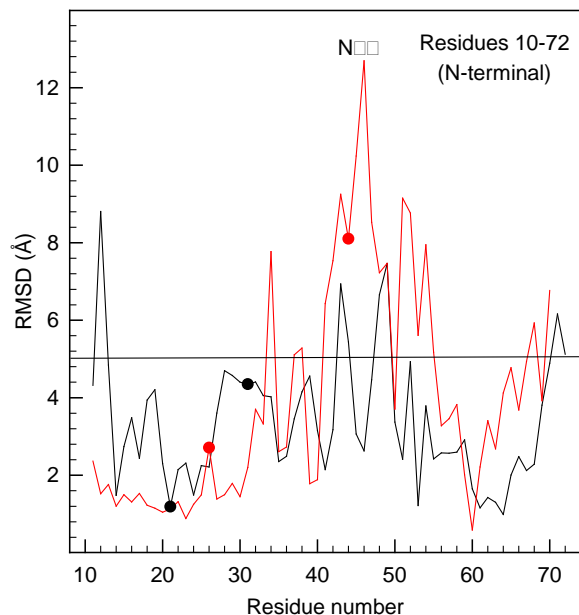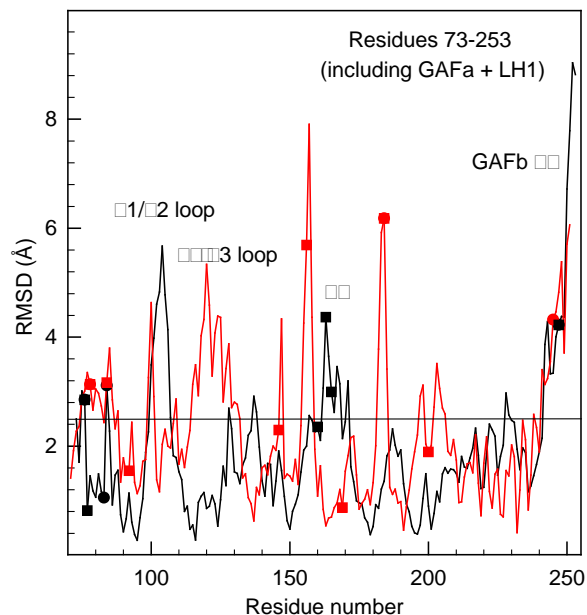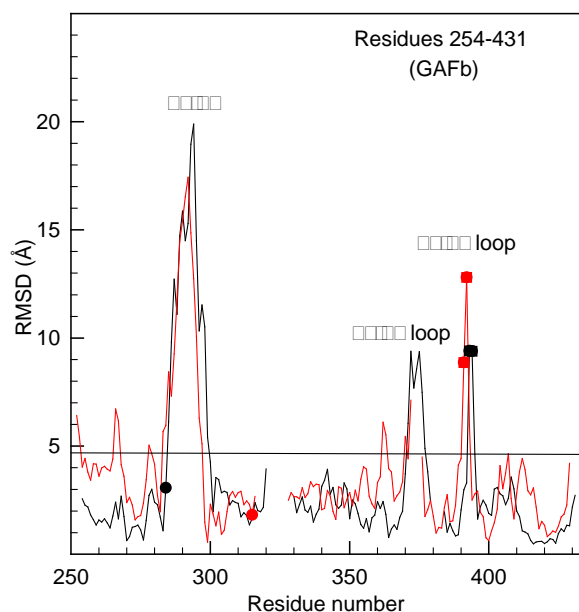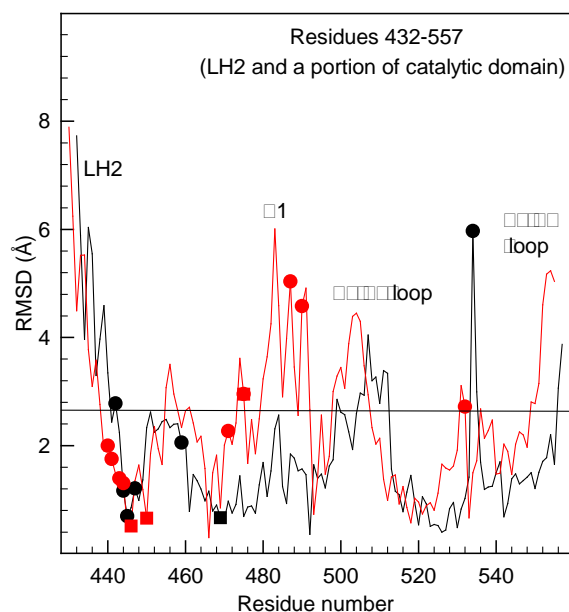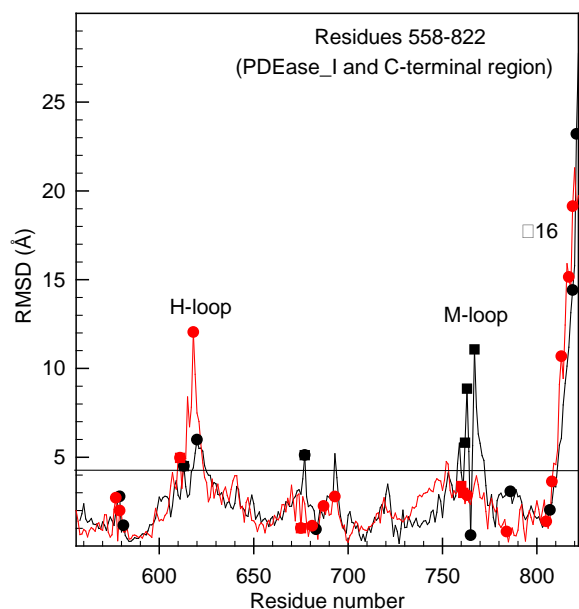

**Fig. S3. RMSD plots of differences between the cryo-EM structure 6MZB and the crosslinked-refined solution structure of PDE6.** Each PDE6 catalytic subunit was divided into five structural regions: N-terminal residues; GAFa domain plus long  $\alpha$ -helix-1 (LH1); GAFb domain; long  $\alpha$ -helix-2 (LH2) plus the first six  $\alpha$ -helical segments of the catalytic domain; and the remainder of the catalytic domain plus the C-terminal region. RMSD per residue was calculated using Visual Molecular Dynamics after aligning each region of our structure with the corresponding residues in PDB 6MZB (3). The black and red lines represent RMSD values for the  $\alpha$ - and  $\beta$ -subunit, respectively. Black and red circles identify inter- and intra-molecular crosslinked residues of the  $\alpha$ - and  $\beta$ -subunit, respectively.  $\alpha$ - and  $\beta$ -subunit residues crosslinked to  $\text{P}\gamma$  are denoted with black or red squares, respectively. The horizontal line is the average RMSD for each region.

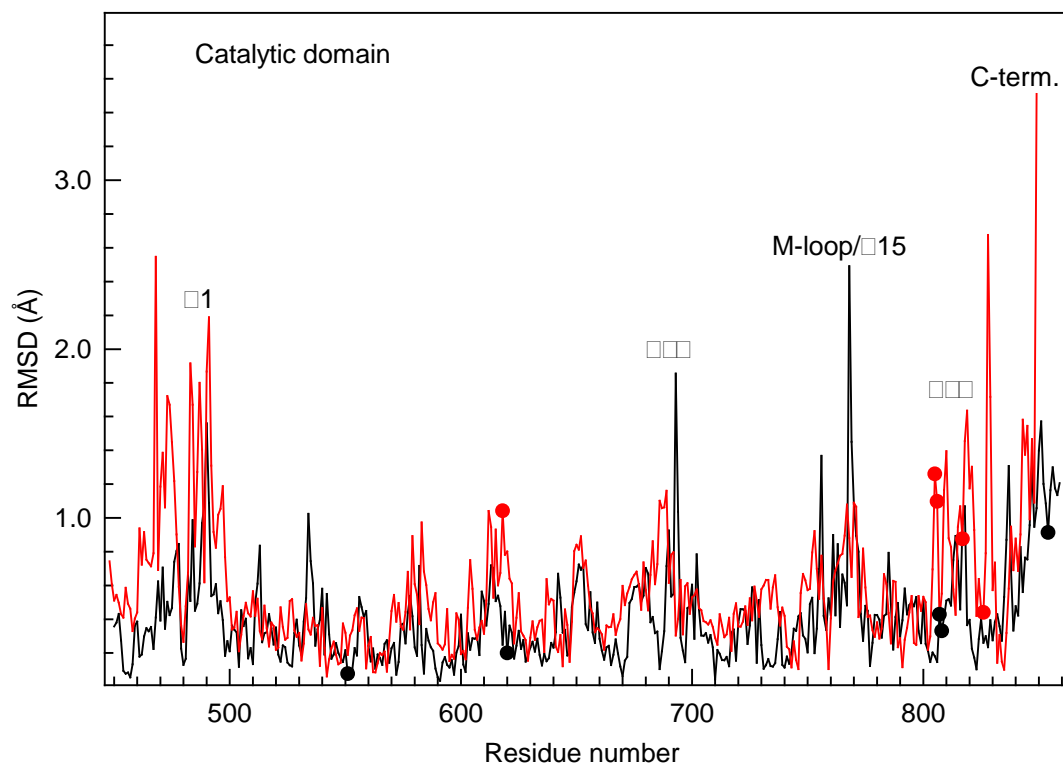

**Fig. S4. RMSD plot comparing the catalytic domains of activated and nonactivated PDE6.** RMSD per residue was calculated using Visual Molecular Dynamics after aligning the catalytic domains (including the C-terminal portion of the GAFb domains) of non-activated PDE6 holoenzyme with the corresponding residues in the transducin-activated PDE6 complex. The black and red lines represent RMSD values for the  $\alpha$ -subunit (residues 455-859) and  $\beta$ -subunit (residues 448-852), respectively. Black and red circles identify inter-molecular crosslinked residues between the two  $G_t\alpha$  subunits and the  $\alpha$ - and  $\beta$ -subunit, respectively. The overall RMSD was 0.5 Å for the  $\alpha$ -subunit and 1.3 Å for the  $\beta$ -subunit.



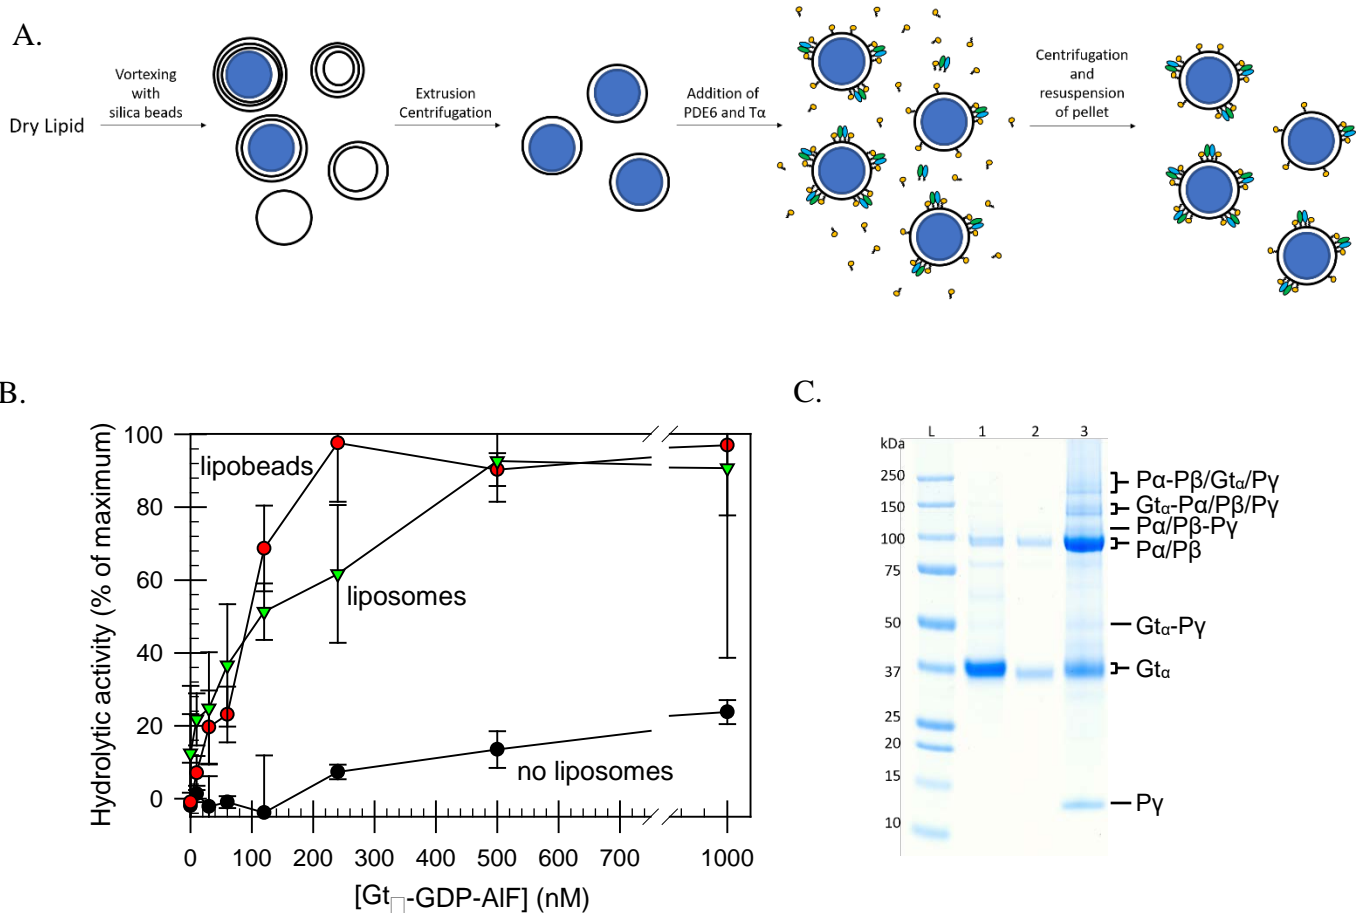

**Fig S5. Preparation of DOTAP/DOPC-coated silica beads (“lipobeards”) for studying transducin activation of PDE6 attached to liposomes.** **A.** Schematic diagram of the process of generating DOPC/DOTAP-coated silica particles, membrane attachment of PDE6 holoenzyme and Gt<sub>α</sub>-GDP-AIF<sub>4</sub><sup>-</sup>, and removal of unbound proteins prior to initiating the cross-linking reaction. **B.** PDE6 holoenzyme (1 nM) was mixed with increasing concentrations of Gt<sub>α</sub>-GDP-AIF<sub>4</sub><sup>-</sup> in the absence of liposomes (black circles), in the presence of multi-lamellar vesicles prepared with DOPC/DOTAP (green triangles) or DOPC/DOTAP-coated lipobeards (red circles). **C.** SDS-PAGE illustrating removal of unbound proteins prior to crosslinking the lipobeard-bound activated complex of Gt<sub>α</sub>-GDP-AIF<sub>4</sub><sup>-</sup> and PDE6. Lane 1 is the supernatant fraction following initial centrifugation of the lipobeards to remove unbound Gt<sub>α</sub> (~37 kDa) and PDE6 catalytic subunits (~100 kDa). Lane 2 is the supernatant fraction after the crosslinking reaction was completed, while Lane 3 is the resuspended lipobeard pellet containing the pulled-down crosslinked proteins that are excised from the gel for mass spectrometric analyses (*see Materials and Methods*).

## References

1. Barren, B., Gakhar, L., Muradov, H., Boyd, K. K., Ramaswamy, S., and Artemyev, N. O. (2009) Structural basis of phosphodiesterase 6 inhibition by the C-terminal region of the  $\gamma$ -subunit. *EMBO J* **28**, 3613-3622
2. Heikaus, C. C., Pandit, J., and Klevit, R. E. (2009) Cyclic nucleotide binding GAF domains from phosphodiesterases: structural and mechanistic insights. *Structure* **17**, 1551-1557
3. Gulati, S., Palczewski, K., Engel, A., Stahlberg, H., and Kovacic, L. (2019) Cryo-EM structure of phosphodiesterase 6 reveals insights into the allosteric regulation of type I phosphodiesterases. *Sci Adv.* 10.1126/sciadv.aav4322
4. Ke, H., and Wang, H. (2007) Crystal structures of phosphodiesterases and implications on substrate specificity and inhibitor selectivity. *Curr. Top. Med. Chem* **7**, 391-403
5. Martinez, S. E., Heikaus, C. C., Klevit, R. E., and Beavo, J. A. (2008) The structure of the GAF A domain from phosphodiesterase 6C reveals determinants of cGMP binding, a conserved binding surface, and a large cGMP-dependent conformational change. *J. Biol. Chem* **283**, 25913-25919
